# Supplementary material for: A Multi-Institutional Longitudinal Faculty Development Program in Humanism Supports the Professional Development of Faculty Teachers
Source: PubMed Central journal article supplement — Acad Med. 2017 Oct 3;92(12):1680–6. doi: 10.1097/ACM.0000000000001940 (PMC5704738; doi:10.1097/acm.0000000000001940), 2017-10-03
Supplement: acm-92-1680-s001.pdf [file acm-92-1680-s001.pdf]

Supplemental digital content for Branch WT Jr., Frankel RM, Hafler JP, et al. A multi-institutional longitudinal faculty development program in humanism supports the professional development of faculty teachers. Acad Med.

### Supplemental Digital Appendix 1

#### Schools and Participants by Year in Faculty Development Program to Develop Humanistic Teachers and Role Models<sup>a</sup>

Number of faculty participants by academic year

| Medical School                                           | Facilitator                                                                                                                                                | 2005-06 | 2006-07 | 2007-08 | 2008-09 | 2009-10 | 2010-11 | 2011-12 | 2012-13 | 2013-14         | 2014-15 | 2015-16 | 2016-17         |
|----------------------------------------------------------|------------------------------------------------------------------------------------------------------------------------------------------------------------|---------|---------|---------|---------|---------|---------|---------|---------|-----------------|---------|---------|-----------------|
| Emory University School of Medicine                      | 2005-06: William T. Branch, Jr., MD; 2013-14: Kimberly Manning, MD, Corrine Abraham, DNP, RN                                                               | 7       |         |         |         |         |         |         |         | 11 <sup>b</sup> |         |         |                 |
| Baylor College of Medicine                               | Paul Haidet, MD, MPH                                                                                                                                       | 7       |         |         |         |         |         |         |         |                 |         |         |                 |
| University of Rochester School of Medicine and Dentistry | Catherine Gracey, MD                                                                                                                                       | 8       |         |         |         |         |         |         |         |                 |         |         |                 |
| Indiana University School of Medicine                    | 2005-06: Gary Mitchell, MD, Richard M. Frankel, PhD; 2013-14: Jeffrey Rothenberg, MD; 2013-17: Debra K. Litzelman, MD; 2016-17: Heather A. McCabe, JD, MSW | 7       |         |         |         |         |         |         |         | 8               | 7       |         | 11 <sup>b</sup> |
| University of Minnesota Medical School                   | 2005-06, 2016-17: Peter Weissmann, MD; 2016-17:                                                                                                            | 5       |         |         |         |         |         |         |         |                 |         |         | 9 <sup>b</sup>  |

Copyright © by the Association of American Medical Colleges. Unauthorized reproduction is prohibited.

Supplemental digital content for Branch WT Jr., Frankel RM, Hafler JP, et al. A multi-institutional longitudinal faculty development program in humanism supports the professional development of faculty teachers. Acad Med.

|                                                      |                                                                                                    |  |  |  |  |   |   |   |   |   |   |   |                    |
|------------------------------------------------------|----------------------------------------------------------------------------------------------------|--|--|--|--|---|---|---|---|---|---|---|--------------------|
|                                                      | Melissa Atwood, PharmD                                                                             |  |  |  |  |   |   |   |   |   |   |   |                    |
| UCSF School of Medicine                              | 2009-11: Calvin Chou, MD, PhD, David Irby, PhD; 2016-17: Calvin Chou, MD, PhD, Kara Myers, CNM, MS |  |  |  |  | 9 |   |   |   |   |   |   | 9 <sup>b</sup>     |
| UC San Diego School of Medicine                      | Neil J. Farber, MD                                                                                 |  |  |  |  | 8 | 7 |   |   |   |   |   |                    |
| UC Davis School of Medicine                          | Craig Keenan, MD                                                                                   |  |  |  |  | 7 |   |   |   |   |   |   |                    |
| University of Massachusetts Medical School           | 2009-11, 2016-17: David Hatem, MD; 2016-17: Janet Fraser Hale, PhD, RN, FNP                        |  |  |  |  | 7 |   |   |   |   |   |   | 9 <sup>b</sup>     |
| Brigham and Women's Hospital, Harvard Medical School | Jane Sillman, MD, Mariah Quinn, MD                                                                 |  |  |  |  | 7 |   |   |   |   |   |   |                    |
| St. Francis Medical Center                           | Gregory Makoul, PhD                                                                                |  |  |  |  | 8 |   |   |   |   |   |   |                    |
| David Geffen School of Medicine at UCLA              | 2009-15: Luann Wilkerson, EdD; 2009-17: Margaret Stuber, MD                                        |  |  |  |  | 8 | 8 | 7 | 8 | 8 | 8 | 7 | 8, 10 <sup>p</sup> |
| Augusta University,                                  | William Salazar, MD                                                                                |  |  |  |  | 7 |   |   |   |   |   |   |                    |

Supplemental digital content for Branch WT Jr., Frankel RM, Hafler JP, et al. A multi-institutional longitudinal faculty development program in humanism supports the professional development of faculty teachers. Acad Med.

|                                                             |                                                                                |  |  |  |  |  |  |   |    |    |    |                 |  |
|-------------------------------------------------------------|--------------------------------------------------------------------------------|--|--|--|--|--|--|---|----|----|----|-----------------|--|
| Medical College of Georgia                                  |                                                                                |  |  |  |  |  |  |   |    |    |    |                 |  |
| Stanford University School of Medicine                      | Lars G. Osterberg, MD                                                          |  |  |  |  |  |  |   | 9  | 9  | 10 |                 |  |
| Yale School of Medicine                                     | Janet Hafler, EdD, Dana Dunne, MD                                              |  |  |  |  |  |  |   | 7  | 16 |    | 7 <sup>b</sup>  |  |
| Boston Children's Hospital, Harvard Medical School          | 2013-17: Elizabeth A. Rider, MSW, MD; 2016-17: Deborah Navedo, PhD, CPNP, FNAP |  |  |  |  |  |  |   | 10 |    | 11 | 11 <sup>b</sup> |  |
| Medical University of South Carolina                        | Shakub Rehman, MD, Benjamin Clyborn, MD                                        |  |  |  |  |  |  |   | 7  |    |    |                 |  |
| University of North Carolina Chapel Hill School of Medicine | Amy B. Weil, MD                                                                |  |  |  |  |  |  |   | 7  | 6  | 9  | 6               |  |
| Vanderbilt University School of Medicine                    | Lynn Webb, PhD                                                                 |  |  |  |  |  |  |   | 7  |    |    |                 |  |
| University of Virginia School of Medicine                   | Margaret Plews-Ogan, MD, Daniel Becker, MD                                     |  |  |  |  |  |  |   | 11 | 7  |    |                 |  |
| Medical College of Wisconsin                                | MaryAnn C. Gilligan, MPH, MD, Arthur R. Derse, MD, JD                          |  |  |  |  |  |  | 8 |    | 7  |    |                 |  |

Supplemental digital content for Branch WT Jr., Frankel RM, Hafler JP, et al. A multi-institutional longitudinal faculty development program in humanism supports the professional development of faculty teachers. Acad Med.

|                                                          |                                                                                                                                                                                    |  |  |  |  |  |  |  |                    |                    |                                       |                                        |                   |
|----------------------------------------------------------|------------------------------------------------------------------------------------------------------------------------------------------------------------------------------------|--|--|--|--|--|--|--|--------------------|--------------------|---------------------------------------|----------------------------------------|-------------------|
| Penn State Hershey Medical Center                        | Paul Haidet, MD, MPH                                                                                                                                                               |  |  |  |  |  |  |  |                    | 5                  |                                       |                                        |                   |
| Colorado University School of Medicine                   | Rachel Swigris, MD                                                                                                                                                                 |  |  |  |  |  |  |  | N <sup>c,d,e</sup> | 3 <sup>c,d,e</sup> |                                       |                                        |                   |
| George Washington University School of Medicine          | Benjamin (Jim) Blatt, MD                                                                                                                                                           |  |  |  |  |  |  |  |                    |                    |                                       | 44 <sup>c,f</sup>                      | 30 <sup>c,f</sup> |
| University of Vermont College of Medicine                | Alan Rubin, MD                                                                                                                                                                     |  |  |  |  |  |  |  | 6 <sup>c,d</sup>   |                    |                                       |                                        |                   |
| Faculty of Medicine and Dentistry, University of Alberta | Carol Hodgson, PhD, Pamela Brett-MacLean, PhD                                                                                                                                      |  |  |  |  |  |  |  | 12 <sup>c</sup>    | 10 <sup>c</sup>    | 11 <sup>c,h</sup><br>9 <sup>c,g</sup> | 11 <sup>c,g,h</sup>                    |                   |
| Cumming School of Medicine, University of Calgary        | Janet de Groot, M.D., FRCPC, MSc, Susan Kuhn, M.D., FRCPC, Lara Nixon, MD, CCFP(COE), FCFP, Tom Rosenal, MD, FRCPC, Amanda Roze des Ordon, MD, FRCPC, MMed, Sarah Weeks, MD, FRCPC |  |  |  |  |  |  |  |                    |                    | 12 <sup>c,h</sup>                     | 15 <sup>c,h</sup><br>10 <sup>c,g</sup> |                   |

|                                                                                |                                                                                                                           |  |  |  |  |  |  |  |  |  |  |                   |                    |                                      |
|--------------------------------------------------------------------------------|---------------------------------------------------------------------------------------------------------------------------|--|--|--|--|--|--|--|--|--|--|-------------------|--------------------|--------------------------------------|
| Dalhousie<br>Medicine New<br>Brunswick,                                        | Denise Hollway<br>BSc, PT, MSc                                                                                            |  |  |  |  |  |  |  |  |  |  | 14 <sup>c,h</sup> |                    |                                      |
| Faculty of<br>Medicine,<br>Dalhousie<br>University,<br>Halifax, Nova<br>Scotia | Joanne<br>MacDonald, MD,<br>FRCPC, Wendy<br>A. Stewart, MD,<br>PhD, FRCPC                                                 |  |  |  |  |  |  |  |  |  |  |                   |                    |                                      |
| Faculty of<br>Medicine,<br>University of<br>Toronto                            | Anne Matlow,<br>MD, FRCPC,<br>Anna Skorzewska,<br>MD, FRCPC                                                               |  |  |  |  |  |  |  |  |  |  | 18 <sup>c,h</sup> | 14 <sup>c,h</sup>  |                                      |
| Hofstra<br>Northwell<br>School of<br>Medicine                                  | 2014-17: Alice<br>Fornari, EdD<br>2016-17: Taranjeet<br>Ahuja, DO,<br>Tiffany M. Jordan,<br>MHEA, Isabel<br>Friedman, DNP |  |  |  |  |  |  |  |  |  |  | 96 <sup>c,f</sup> | 132 <sup>c,f</sup> | 137 <sup>c,f</sup><br>9 <sup>b</sup> |

<sup>a</sup>As of 2017, 30 institutions have participated; 22 were supported by grants. Also, as of 2017, 993 faculty, including some residents, completed the program.

<sup>b</sup>Interprofessional groups (at least three health care professions represented).

Supplemental digital content for Branch WT Jr., Frankel RM, Hafler JP, et al. A multi-institutional longitudinal faculty development program in humanism supports the professional development of faculty teachers. Acad Med.

<sup>c</sup>Voluntary school, not grant supported.

<sup>d</sup>Participated in an evaluation even though voluntary.

<sup>e</sup>Number of program completers could not be obtained.

<sup>f</sup>Small-group humanistic faculty development sessions provided for large scale educational program faculty.

<sup>g</sup>Residents who completed the program.

<sup>h</sup>Received Royal College Faculty Development funding.
